RESEARCH ARTICLE

# Suicidal Behavior and Haplotypes of the Dopamine Receptor Gene (*DRD2*) and ANKK1 Gene Polymorphisms in Patients with Alcohol Dependence – Preliminary Report

Andrzej Jasiewicz<sup>1</sup>, Agnieszka Samochowiec<sup>2</sup>, Jerzy Samochowiec<sup>1</sup>, Iwona Małecka<sup>1</sup>, Aleksandra Suchanecka<sup>1</sup>, Anna Grzywacz<sup>1\*</sup>

1. Department of Psychiatry, Pomeranian Medical University, Szczecin, Poland, 2. Institute of Psychology, Department of Clinical Psychology, University of Szczecin, Szczecin, Poland

\*[annagrzywacz@gazeta.pl](mailto:annagrzywacz@gazeta.pl)

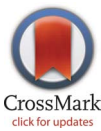

 OPEN ACCESS

**Citation:** Jasiewicz A, Samochowiec A, Samochowiec J, Małecka I, Suchanecka A, et al. (2014) Suicidal Behavior and Haplotypes of the Dopamine Receptor Gene (*DRD2*) and ANKK1 Gene Polymorphisms in Patients with Alcohol Dependence – Preliminary Report. PLoS ONE 9(11): e111798. doi:10.1371/journal.pone.0111798

**Editor:** Vinod K. Yaragudri, Nathan Kline Institute for Psychiatric Research and New York School of Medicine, United States of America

**Received:** February 7, 2014

**Accepted:** October 8, 2014

**Published:** November 21, 2014

**Copyright:** © 2014 Jasiewicz et al. This is an open-access article distributed under the terms of the [Creative Commons Attribution License](https://creativecommons.org/licenses/by/4.0/), which permits unrestricted use, distribution, and reproduction in any medium, provided the original author and source are credited.

**Funding:** This work was supported by Ministry of Science and Higher Education: NN 402466540. The funders had no role in study design, data collection and analysis, decision to publish, or preparation of the manuscript.

**Competing Interests:** The authors have declared that no competing interests exist.

## Abstract

Suicide is a significant public health issue and a major cause of death throughout the world. According to WHO it accounts for almost 2% of deaths worldwide. The etiology of suicidal behavior is complex but the results of many studies suggest that genetic determinants are of significant importance. In our study, we have analyzed selected SNPs polymorphisms in the *DRD2* and *ANKK1* genes in patients with alcohol dependence syndrome (169 Caucasian subjects) including a subgroup of individuals (n=61) who have experienced at least one suicide attempt. The aim of the study was to verify if various haplotypes of selected genes, comprising Taq1A, Taq1B, and Taq1D single nucleotide polymorphisms (SNP), play any role in the development of alcohol dependence and suicidal behavior. The control group comprised 157 unrelated individuals matched for ethnicity, gender, and age and included no individuals with mental disorders. All subjects were recruited in the North West region of Poland. The study showed that alcohol dependent subjects with a history of at least one suicidal attempt were characterized by a significantly higher frequency of the T-G-A2 haplotype when compared to individuals in whom alcohol dependence was not associated with suicidal behavior (p=0.006). It appears that studies based on identifying correlation between SNPs is the future for research on genetic risk factors that contribute to the development of alcohol addiction and other associated disorders. To sum up, there is a necessity to perform further research to explain dependencies between the dopaminergic system, alcohol use disorders and suicidal behavior.

## Introduction

Suicide is a significant public health issue and a major cause of death throughout the world. According to WHO it accounts for almost 2% of deaths worldwide [1].

The etiology of suicidal behavior is complex and the results of twin and adoption studies suggest that this issue has also genetic determinants [2,3]. Andrei Marušić wrote a comprehensive article about a possible history and geography of suicide attempts. He suggested that people who live within the J-curve (on the map of Europe – the countries with a higher suicide rate) could share genes, - that may not tolerate excessive amounts alcohol, the combination of which is more likely to end in suicidal behavior [4]. It is worth noticing that one of the first who pointed that some ethnic groups who have a collection of shared genes can have an elevated susceptibility to suicide was Kondrichin [5].

Since it was revealed that the low central nervous system serotonin (*5-HT*) turnover is related to suicidal behavior [6], serotonin-related genes have been the focus of several association studies [7]. These studies confirmed that suicidality, impulsiveness, and depression share a common genetic basis and biological substrate of the *5-HT* dysfunction [8,9,10]. Additionally, the noradrenergic and dopaminergic systems, hypothalamic-pituitary-adrenal (HPA) axis, and brain-derived neurotrophic factor have been examined for candidate genes of suicidal behavior, but no consistent associations have been identified so far [11].

Apart from the genetic factors, most studies confirm a close relationship between the risk of suicide and alcohol use disorders [12,13]. In the study of Inskip et al., - the lifetime risk of suicide in individuals with alcohol dependence proved higher than in those with mood disorders [14]. Moreover, the results of the most recent studies suggest that the inherited factors for suicidal susceptibility should not be considered independently from alcohol consumption [4].

Dopamine is a neurotransmitter whose role in the development of substance abuse, including alcohol dependence, is relatively best understood. It was suggested that dopamine is involved in the transmission of subjectively assessed pleasure stimulation, e.g. during a sexual intercourse, eating, drinking, or other strongly motivated behaviors, including positively enhancing effects of alcohol. According to some animal studies, a single exposure to alcohol is reflected by a higher bioelectrical activity of the ventral tegmental neurons and increased release of dopamine in nucleus accumbens. These effects were not attenuated in the case of chronic alcohol intoxication, suggesting lack of tolerance to the rewarding effects of alcohol. In contrast, the dopaminergic activity was reduced in the course of the abstinence syndrome, and therefore it can be involved in the development of aversive signs associated with abstinence, as well as it can stimulate alcohol abuse [15,16].

Bearing the abovementioned evidence in mind, it cannot be excluded that the decreased dopaminergic activity can also be a determinant of suicide attempts. Consequently, we hypothesized that the genes involved in dopamine metabolism can be involved in common etiopathogenesis of alcohol use disorders and suicidal behavior. The results of previous studies addressing the role of the dopaminergic system in the development of alcohol dependence suggest that the dopamine receptor *DRD2* gene is a potential candidate gene involved in such a common etiopathogenic pathway [17].

The *DRD2* gene is located on the chromosome 11q23.2 [18]. Polymorphisms Taq 1A in the *ANKK1* gene connected with dopaminergic system disorders [19, 20]. Nevertheless the Taq1B and Taq1D variants are located in introns 1 and 2 of the *DRD2*, respectively [21]. The most studied polymorphisms of these genes include the Taq1A restriction fragment length polymorphism [22] and Taq1B restriction fragment length polymorphism [23]. The Taq1A polymorphism creates two alleles: A1 (variant) and A2 [22]. Significant associations between the Taq1A polymorphism and substance dependence have been documented in some [18, 24, 25] but not all studies [26, 27]. The Taq1B polymorphism consists of two alleles: B1 (Taq1 “absent”) and B2 (Taq1 “present”) allele [23, 28]. The Taq1B polymorphism was also associated with alcohol dependence [29] and other substance abuses [25, 26, 30].

In this study, - we have analyzed selected SNPs polymorphisms in the *DRD2* and *ANKK1* genes in patients with the alcohol dependence syndrome including a subgroup of individuals who have experienced at least one suicide attempt. The aim of the study was to verify if various haplotypes of the selected genes, comprising the Taq1A, Taq1B, and Taq1D single nucleotide polymorphisms (SNP) play any role in the development of alcohol dependence and suicidal behavior.

## Material and Methods

This study involved a group of 169 Caucasian subjects ( $33 \pm 8.5$  years of age, range 19–61 years), with no history of psychiatric disorders other than alcohol or nicotine dependence as classified by ICD-10. This group included a subgroup of patients ( $n=61$ ) who had a documented history of at least one suicidal attempt. Other phenotypic characteristics of analyzed alcohol dependent subjects are presented in Table 1. The control group comprised 157 unrelated individuals matched for ethnicity, gender, and age ( $38 \pm 15.9$  years, range 18–80), and included no individuals with mental disorders excluded by means of the Primary Care Evaluation of Mental Disorders (Prime MD) questionnaire. All subjects were recruited in the North West region of Poland. Alcohol use and family history of alcoholism were assessed by means of a structured interview, based on the Polish version of Semi-Structured Assessment on Genetics in Alcoholism (SSAGA).

**Table 1.** Phenotypic characteristics of the studied alcohol dependent subjects (n=169).

| Variable                                      | n   | %    |
|-----------------------------------------------|-----|------|
| <b>Familial history of alcohol dependence</b> |     |      |
| No                                            | 111 | 65,7 |
| Yes                                           | 57  | 33,7 |
| No data                                       | 1   | 0,6  |
| <b>Dissocial personality</b>                  |     |      |
| No                                            | 109 | 64,5 |
| Yes                                           | 60  | 35,5 |
| <b>Delirium and/or seizures</b>               |     |      |
| No                                            | 117 | 69,2 |
| Yes                                           | 49  | 29,0 |
| No data                                       | 3   | 1,8  |
| <b>Early onset of drinking</b>                |     |      |
| No                                            | 47  | 27,8 |
| Yes                                           | 121 | 71,6 |
| No data                                       | 1   | 0,6  |
| <b>Lesch typology</b>                         |     |      |
| Proper type                                   | 36  | 21,3 |
| Neurotic type                                 | 44  | 26,0 |
| Psychotic type                                | 50  | 29,6 |
| Organic type                                  | 26  | 15,4 |
| No data                                       | 13  | 7,7  |
| <b>Cloninger's typology</b>                   |     |      |
| Type I                                        | 39  | 23,1 |
| Type II                                       | 130 | 76,9 |

doi:10.1371/journal.pone.0111798.t001

The study protocol was approved by the local Ethic Committee of Pomeranian Medical University and all the participants provided their written informed consent.

The genomic DNA was isolated from whole venous blood according to standard procedures. All genotyping was performed with the fluorescence resonance energy transfer Real-Time method using the Light Cycler System 2.0. The following conditions were applied in order to analyze the polymorphism of the *DRD2* receptor gene. A polymerase chain reaction (PCR) was performed with 50 ng DNA in a total volume of 20 ml containing 2 ml reaction mixture, 0.5 mM of each primer, 0.2 mM of each hybridization probe, and 2 mM MgCl<sub>2</sub>. According to the manufacturer's instructions, 35 cycles of denaturation (95 °C for 10 min), annealing (60 °C for 10 sec) and extension (72 °C for 15 sec) were performed. After amplification, a melting curve was generated by holding the reaction at 40 °C for 20 seconds and then heating slowly up to 85 °C. The fluorescence signal was plotted against temperature to provide melting curves for each sample. The following SNPs of *DRD2* receptor gene were analyzed: Taq ID

rs1800498 intron 2 (C/T), Taq IB rs1079597 intron 1 (A/G). Apart from that SNP of ANKK1: Taq IA rs1800497 Ex8 (A1/A2) was analyzed[13].

The data analysis was performed using the Statistical Package for Social Sciences (SPSS) version 9.

We calculated power in G\*Power 3.1 using frequencies of genotypes, haplotypes and a number of case subjects.

The differences between controls, alcoholics, and alcoholics with at least one suicide attempt were tested using the  $\chi^2$  test and considered significant if the type 1 error was less than 5% using SPSS. The Hardy Weinberg equilibrium was calculated using the SAS computer program for Windows. The haplotype frequencies were calculated using R with Bioconductor packages haplo.stats and genetics.

## Results

Our study did not reveal any significant relationships between occurrence of alcohol dependence and alcohol dependent subjects with suicidal behavior and the genotypic and allelic frequencies of the analyzed polymorphisms.

No significant deviations from the Hardy Weinberg equilibrium was observed.

No significant statistical differences were observed in the analyzed groups:  $p > 0.05$ .

The statistical power oscillated between 0.1 and 0.6 (Table 2).

The alcohol dependent subjects with a history of at least one suicidal attempt were characterized by a significantly higher frequency of T-G-A2 haplotype when compared to individuals in whom alcohol dependence was not associated with suicidal behavior ( $p = 0.006$ ; Table 3). There was no association between alcohol dependent subjects with a history of at least one suicidal attempt and the same was observed in controls (Table 4).

There was a significant relationships documented by the haplotype analysis of alcohol dependence patients with suicidal attempts, which indicated usefulness of haplotype constructions in etiopathogenetic studies.

## Discussion

A number of researches, which have been performed to date, aimed at describing connections between polymorphisms of genes in the field of serotonergic and dopaminergic systems and alcohol dependency, possibly in connection with suicidal behavior as well. Typically, they are focused on single nucleotide polymorphisms (SNPs). A lot of researches performed, showed dependencies between polymorphisms of genes within the serotonergic system and suicide attempts. E.g. Wojnar et al. have found that the G/G genotype in C1018G *5HT1A* (rs6295) gene polymorphism may be hypothetically responsible for coexistence of suicidal tendencies and relapse of alcohol use susceptibility [31]. Paredes et al. suggested that polymorphic variants on the *5-HT2A* receptor gene

**Table 2.** Frequency of genotypes and alleles of Tag ID rs1800498 intron 2 (C/T), Tag IB rs1079597 intron 1 (A/G), and Tag IA rs1800497 Ex8 (A1/A2) SNPs of *DRD2* receptor gene and *ANKK1* gene in alcohol dependent subjects and alcohol dependent subjects with suicidal behavior.

| Alcohol dependent subjects                        |                       |          |          |                 |           |        |                       |           |           |                 |           |          |                       |          |           |                 |           |       |
|---------------------------------------------------|-----------------------|----------|----------|-----------------|-----------|--------|-----------------------|-----------|-----------|-----------------|-----------|----------|-----------------------|----------|-----------|-----------------|-----------|-------|
|                                                   | Taq1D (rs1800498)     |          |          |                 |           |        | Taq IB (rs1079597)    |           |           |                 |           |          | Taq 1 A (rs1800497)   |          |           |                 |           |       |
|                                                   | C/C                   | C/T      | T/T      | C               | T         | H-W    | A/A                   | A/G       | G/G       | A               | G         | H-W      | A1/A1                 | A1/A2    | A2/A2     | A1              | A2        | H-W   |
| Control (N=157)                                   | 28 (18%)              | 80 (51%) | 49 (31%) | 136 (43%)       | 178 (57%) | 0.636  | 7 (4%)                | 36 (23%)  | 114 (73%) | 50 (16%)        | 264 (84%) | 0.071    | 8 (5%)                | 43 (28%) | 106 (67%) | 59 (19%)        | 255 (81%) | 0.198 |
| Case (N=169)                                      | 31 (18%)              | 87 (52%) | 51 (30%) | 149 (44%)       | 189 (56%) | 0.565  | 8(5%)                 | 53 (31%)  | 108 (64%) | 69 (20%)        | 269 (80%) | 0.650    | 8 (5%)                | 58 (34%) | 103 (61%) | 74 (22%)        | 264 (78%) | 0.963 |
| <i>p</i> /power                                   | <i>p</i> –0.978/0.056 |          |          | <i>p</i> –0.843 |           |        | <i>p</i> –0.219/0.655 |           |           | <i>p</i> –0.747 |           |          | <i>p</i> –0.400/0.441 |          |           | <i>p</i> –0.326 |           |       |
| Alcohol dependent subjects with suicidal behavior |                       |          |          |                 |           |        |                       |           |           |                 |           |          |                       |          |           |                 |           |       |
|                                                   | C/C                   | C/T      | T/T      | C               | T         | A/A    | A/G                   | G/G       | A         | G               | A1/A1     | A1/A2    | A2/A2                 | A1       | A2        |                 |           |       |
| Control (N=157)                                   | 28 (18%)              | 80 (51%) | 49 (31%) | 136 (43%)       | 178 (57%) | 7 (4%) | 36 (23%)              | 114 (73%) | 50 (16%)  | 264 (84%)       | 8 (5%)    | 43 (27%) | 106 (68%)             | 59 (19%) | 255 (81%) |                 |           |       |
| Case (N=61)                                       | 9 (15%)               | 28 (46%) | 24 (39%) | 46 (38%)        | 76 (62%)  | 0 (0%) | 20 (33%)              | 41 (67%)  | 20 (16%)  | 102 (84%)       | 0 (0%)    | 20 (33%) | 41 (67%)              | 20 (16%) | 102 (84%) |                 |           |       |
| <i>p</i>                                          | <i>p</i> –0.512       |          |          | <i>p</i> –0.287 |           |        | <i>p</i> –0.102       |           |           | <i>p</i> –0.905 |           |          | <i>p</i> –0.169       |          |           | <i>p</i> –0.560 |           |       |

doi:10.1371/journal.pone.0111798.t002

(A-1438G (rs6311) and T102C (rs6313) may predispose for impulsive suicidal behavior [32]. There is also a number of articles which indicate that genes from the dopaminergic system are involved in alcohol dependency. The large-scale meta-analysis from 2013 - of over 18,000 subjects included in 61 case-control studies - confirmed association between the TaqIA polymorphism (the A1 allele showed a significant association with AD) and alcohol dependence [33]. London et al. proved that ethanol decreased anxiety and fatigue in men with the A1 allele of the *ANKK1* TaqIA polymorphism, but increased in men without this allele. They made a conclusion that alcohol-induced negative reinforcement may explain a greater risk for alcohol dependence associated with the A1 allele [34]. Munafò

**Table 3.** Frequency of various haplotypes composed of Tag ID rs1800498 intron 2 (C/T), Tag IB rs1079597 intron 1 (A/G), and Tag IA rs1800497 Ex8 (A1/A2) SNPs of *DRD2* receptor gene and *ANKK1* gene in alcohol dependent subjects with a history of at least one suicidal attempt (n=61) and in individuals in whom alcohol dependence was not associated with suicidal behavior (n=108).

| Haplotype | Haplotype Score | p-value       | Haplotype frequency | No suicidal behavior | Suicidal behavior |
|-----------|-----------------|---------------|---------------------|----------------------|-------------------|
| T-A-A1    | -1.427          | 0.153         | 0.020               | 0.033                | -                 |
| T-G-A1    | -1.288          | 0.197         | 0.021               | 0.029                | 0.008             |
| C-G-A2    | -1.286          | 0.198         | 0.261               | 0.291                | 0.213             |
| C-A-A1    | -1.012          | 0.311         | 0.177               | 0.189                | 0.155             |
| T-G-A2    | 2.705           | <b>0.006*</b> | 0.509               | 0.446                | 0.614             |

Hap-score determines a relationship between a specific haplotype and particular phenotypic quality.  
 \*significance maintained after the Bonferroni correction was included.  
 power =0.580.

doi:10.1371/journal.pone.0111798.t003

**Table 4.** Frequency of various haplotypes composed of Tag ID rs1800498 intron 2 (C/T), Tag IB rs1079597 intron 1 (A/G), and Tag IA rs1800497 Ex8 (A1/A2) SNPs of *DRD2* receptor gene and *ANKK1* gene in alcohol dependent subjects with a history of at least one suicidal attempt (n=61) and in the controls (n=157).

| Haplotype | Haplotype Score | p-value | Haplotype frequency | Controls | Suicidal behavior |
|-----------|-----------------|---------|---------------------|----------|-------------------|
| C-G-A1    | -1.730          | 0.836   | 0.020               | 0.028    | -                 |
| T-G-A1    | -1.349          | 0.177   | 0.026               | 0.033    | 0.008             |
| C-A-A2    | -1.291          | 0.196   | 0.023               | 0.029    | 0.008             |
| C-G-A2    | -0.878          | 0.379   | 0.242               | 0.253    | 0.213             |
| C-A-A1    | 0.843           | 0.399   | 0.130               | 0.120    | 0.155             |
| T-G-A2    | 1.668           | 0.095   | 0.550               | 0.524    | 0.614             |

Hap-score determines a relationship between a specific haplotype and particular phenotypic quality. **power = 0.409.**

doi:10.1371/journal.pone.0111798.t004

also supported association of the individuals possessing the A1 allele of the TaqIA *ANKK1* polymorphism with alcohol dependence [35].

Most of the researches are based usually on trials conducted in order to find associations between a -single SNP or one different gene polymorphism and alcohol dependency. What is worth mentioning is that alcohol dependency syndrome is a multigene disorder. It is very different from the *BRCA1* gene, for example, when one mutation is able to cause a breast cancer. That is why an analysis of a single SNP is insufficient. The former studies have also proved that inheritance of AD is more due to genetics than other factors such as bad habits in the families or environmental factors [36]. It is established that impact of the inherited genes - no matter what sex we describe - is on the level of 50-60% [37-40]. That means it is worth finding genetic causes of the AD syndrome, because in the future this knowledge could be used effectively in prevention or treatment.

What we were interested in was not only the connection between genes and AD, but we also decided to focus on suicidal behavior. There is, unfortunately, a lack of comprehensive research which takes into consideration connections between the dopaminergic system, alcohol dependence and suicide attempts.

In 2009, Suda et al. described their findings by suggesting that gene polymorphisms from the dopaminergic system might have been involved in the biological susceptibility to suicide [41]. They took into consideration polymorphisms TaqIA and -141C Ins/Del. Both- the Ins allele of -141C Ins/Del and the A2 allele of TaqIA were significantly more frequent in suicide attempters. In our survey we showed that there is a significantly higher frequency of haplotype consisting of the A2 allele of TaqIA (haplotype T-G-A2) in subjects with AD and at least one suicidal attempt in comparison with those without a suicidal history. In a German research on alcoholics the - 141C Del variant of the *DRD2* might be a risk factor in a highly burdened subgroup of alcoholics with a paternal and grandpaternal history of alcohol dependence and it might contribute to the substantially higher likelihood of suicide in alcohol dependent subjects [42].

As it was said, we concentrated on the fact that AD as a multigene disorder must be connected with a number of gene polymorphisms placed in different



parts of a genome. Therefore, a search for genetic changes, which could be identified as risk factors in the development of alcohol dependence, should not be focused only on analyzing associations of individual polymorphisms in candidate genes [43–44]. On the basis of the current knowledge it is more reasonable to seek epistatic interactions of polymorphisms located on different chromosomes [45].

Preuss et al. also analyzed the *DRD2* gene and *ANKK1* haplotypes (141 Ins/Del, Taq1B, Taq1D, rs 1079594, TaqIA). He showed a significant association with regular drinking (Ins-C-G-C-A1) and smoking (Ins-T-G-A-A2) [46]. To everything said before, we add the context of a suicidal behavior. The outcome of our research was a significant association of the T-G-A2 haplotype in subjects with AD and at least one suicide attempt compared with alcohol dependence without a suicidal history. We did not search for any connection with nicotine addiction. The results show a probability of a stronger connection between this variant of haplotype and suicidal behavior than with AD. In addition, different genes were tested for associations with suicidal attempts. Zill has chosen 20 SNPs covering the second isoform of the tryptophan hydroxylase gene (*TPH2*) to search for any role of the gene in pathophysiology of alcohol dependence or alcohol dependence - related phenotype suicidal behavior. None has been found to play a major role. Undoubtedly, further analyses are needed [47].

A small number of subjects in the analyzed group was a limitation to our research. It was an exploration sample and requires replication on a larger group.

It appears that studies based on identifying a correlation between SNPs is the future for research on genetic risk factors that contribute to the development of alcohol addiction and other associated disorders. To sum up, there is a necessity to perform further research to explain dependencies between the dopaminergic system, alcohol use disorders and suicidal behavior.

## Author Contributions

Conceived and designed the experiments: AG AJ. Performed the experiments: AG AJ IM. Analyzed the data: AG AJ JS IM A. Suchanecka A. Samochowicz. Contributed reagents/materials/analysis tools: AG IM A. Suchanecka. Wrote the paper: AJ AG.

## References

1. **World Health Organization** (2006) World Health Report 2000. Health Systems: Improving Performance. World Health Organization: Geneva, 2000. (B Bondy, A Buettner and P Zill Genetics of suicide *Molecular Psychiatry* 11: 336–351.
2. **Brent DA, Mann JJ** (2005) Family genetic studies, suicide, and suicidal behavior. *Am J Med Genet C Semin Med Genet* 133C: 13–24.
3. **McGuffin P, Marusic A, Farmer A** (2001) What can psychiatric genetics offer suicidology? *Crisis* 22: 61–65.
4. **Andrej Marušić** (2005) History and Geography of Suicide: Could Genetic Risk Factors Account for The Variation in Suicide Rates? *Am J Med Genet C Semin. Med. Genet* 133C: 43–47.
5. **Kondrichin SV** (1995) Suicide among Finno- Ugrians. *Lancet* 346: 1632–1633.



6. **Mann JJ** (2003) Neurobiology of suicidal behaviour. *Nat Rev Neurosci* 4: 819–828.
7. **Courtet P, Jollant F, Castelnau D, Buresi C, Malafosse A** (2005) Suicidal behavior: relationship between phenotype and serotonergic genotype. *Am J Med Genet C Semin Med Genet* 133C: 25–33.
8. **Gorwood P** (2001) Biological markers for suicidal behavior in alcohol dependence. *Eur Psychiatry* 16: 410–417.
9. **Joiner TE, Johnson F, Soderstrom K** (2002) Association between serotonin transporter gene polymorphism and family history of attempted and completed suicide. *Suicide Life Threat Behav* 32: 329–332.
10. **Preuss UW, Koller G, Soyka M, Bondy B** (2001) Association between suicide attempts and 5-HTTLPR-S-allele in alcohol-dependent and control subjects: further evidence from a German alcohol dependent inpatient sample. *Biol Psychiatry* 50: 636–639.
11. **Brezo J, Klempan T, Turecki G** (2008) The genetics of suicide: A critical review of molecular studies. *Psychiatr Clin North Am* 31: 179–203.
12. **Schuckit MA** (1986) Primary men alcoholics with histories of suicide attempts. *J Stud Alcohol* 47: 78–81.
13. **Preuss UW, Schuckit MA, Smith TL, Danko GP, Buckman K, et al.** (2002) Comparison of 3190 alcohol-dependent individuals with and without suicide attempts. *Alcohol Clin Exp Res* 26: 471–7.
14. **Inskip HM, Harris EC, Barraclough B** (1998) Lifetime risk of suicide for affective disorder, alcoholism and schizophrenia. *Br J Psychiatry* 172: 35–37.
15. **Kidd KK, Morar B, Castiglione CM, Zhao H, Pakstis AJ, et al.** (1998) A global survey of haplotype frequencies and linkage disequilibrium at the DRD2 locus. *Hum Genet* 103: 211–227.
16. **Lu RB, Lee JF, Ko HC, Lin WW** (2001) Dopamine D2 Receptor Gene (*DRD2*) Is Associated With Alcoholism With Conduct Disorder. *Alcohol Clin Exp Res* 25(2): 177–184
17. **Finckh U, Rommelspacher H, Kuhn S, Dufeu P, Otto G, et al.** (1997) Influence of the dopamine D2 receptor (*DRD2*) genotype on neuroadaptive effects of alcohol and the clinical outcome of alcoholism. *Pharmacogenetics* 7(4): 271–81.
18. **Noble EP** (1998) The D2 dopamine receptor gene: a review of association studies in alcoholism and phenotypes. *Alcohol* 16(1): 33–45.
19. **Neville MJ, Johnstone EC, Walton RT** (2004) Identification and characterization of ANKK1: a novel kinase gene closely linked to DRD2 on chromosome band 11q23.1. *Hum Mutat* 23(6): 540–5.
20. **Suchaneka A, Grzywacz A, Samochowiec J** (2011) ANKK1 gene in psychiatry. *Psychiatr Pol* 45(3): 349–56.
21. **Szekely A, Balota DA, Duchek JM, Nemoda Z, Vereczkei A, et al.** (2011) Genetic factors of reaction time performance: DRD4 7-repeat allele associated with slower responses. *Genes Brain Behav.* 10(2): 129–36. doi: 10.1111/j.1601-183X.2010.00645.x. Epub 2010 Oct 7.
22. **Grandy DK, Litt M, Allen L, Bunzow JR, Marchionni M, et al.** (1989) The human dopamine D2 receptor gene is located on chromosome 11 at q22-q23 and identifies a TaqI RFLP. *Am J Hum Genet* 45(5): 778–85.
23. **Hauge XY, Grandy DK, Eubanks JH, Evans GA, Civelli O, et al.** (1991) Detection and characterization of additional DNA polymorphisms in the dopamine D2 receptor gene. *Genomics* 10(3): 527–30.
24. **Hamajima N, Ito H, Matsuo K, Saito T, Tajima K, et al.** (2002) Association between smoking habits and dopamine receptor D2 taqI A A2 allele in Japanese males: a confirmatory study. *J Epidemiol* 12(4): 297–304.
25. **Noble EP, Blum K, Khalsa ME, Ritchie T, Montgomery A, et al.** (1993) Allelic association of the D2 dopamine receptor gene with cocaine dependence. *Drug Alcohol Depend* 33(3): 271–85.
26. **Smith SS, O'Hara BF, Persico AM, Gorelick DA, Newlin DB, et al.** (1992) Genetic vulnerability to drug abuse. The D2 dopamine receptor TaqI B1 restriction fragment length polymorphism appears more frequently in polysubstance abusers. *Arch Gen Psychiatry* 49(9): 723–7.
27. **Karaoguz MY, Sahin FS, Onen I, Cosar B, Arikan Z, et al.** (2004) Lack of association between TaqIA RFLP of the dopamine D2 receptor gene and alcoholism in type II Turkish alcoholics. *Korean J Genetic* 26(2): 149–54.
28. **Castiglione CM, Deinard AS, Speed WC, Sirugo G, Rosenbaum HC, et al.** (1995) Evolution of haplotypes at the DRD2 locus. *Am J Hum Genet* 57(6): 1445–56.

29. **Blum K, Noble EP, Sheridan PJ, Montgomery A, Ritchie T, et al.** (1993) Genetic predisposition in alcoholism: association of the D2 dopamine receptor TaqI B1 RFLP with severe alcoholics. *Alcohol* 10(1): 59–67.
30. **Robinson JD, Lam CY, Minnix JA, Wetter DW, Tomlinson GE, et al.** (2007) The DRD2 TaqI-B polymorphism and its relationship to smoking abstinence and withdrawal symptoms. *Pharmacogenomics J* 7(4): 266–74
31. **Wojnar M, Brower KJ, Jakubczyk A, Żmigrodzka I, Burmeister M, et al.** (2007) Influence of impulsiveness, suicidality, and serotonin genes on treatment outcomes in alcohol dependence – a preliminary report. *Archives of Psychiatry and Psychotherapy* 3: 13–18.
32. **Paredes B, Sáiz PA, García-Portilla MP, Morales B, Pajín M, et al.** (2008) Association between A-1438G polymorphism in the 2A (5-HT<sub>2A</sub>) serotonin receptor gene and impulsivity in suicidal behavior. *Emergencias* 20: 93–100
33. **Wang F, Simen A, Arias A, Lu QW, Zhang H** (2013) A large-scale meta-analysis of the association between the ANKK1/DRD2 Taq1A polymorphism and alcohol dependence. *Hum Genet* 132(3): 347–58. doi: 10.1007/s00439-012-1251-6. Epub 2012 Dec 1.
34. **London ED, Berman SM, Mohammadian P, Ritchie T, Mandelkern MA, et al.** (2009) Effect of the Taq1A polymorphism on ethanol response in the brain. *Psychiatry Res* 174(3): 163–70. doi: 10.1016/j.psychres.2009.07.008. Epub 2009 Nov 13.
35. **Munafò MR, Matheson IJ, Flint J** (2007) Association of the DRD2 gene Taq1A polymorphism and alcoholism: a meta-analysis of case-control studies and evidence of publication bias. *Mol Psychiatry* 12(5): 454–61. Epub 2007 Jan 9.
36. **Bohman M, Cloninger CR, von Knorring AL, Sigvardsson S** (1984) An adoption study of somatoform disorders. III. Cross-fostering analysis and genetic relationship to alcoholism and criminality. *Arch Gen Psychiatry* 41(9): 872–8.
37. **Heath AC, Bucholz KK, Madden PA, Dinwiddie SH, Slutske WS, et al.** (1997) Genetic and environmental contributions to alcohol dependence risk in a national twin sample: consistency of findings in women and men. *Psychol Med* 27: 1381–1396.
38. **Heath AC, Martin NG** (1994) Genetic influences on alcohol consumption patterns and problem drinking: results from the Australian NH&MRC twin panel follow up survey. *Ann NY Acad Sci* 708: 72–85.
39. **Kendler KS, Neale MC, Heath AC, Kessler RC, Eaves LJ** (1994) A twin family Study of alcoholism in women. *Am J Psychiatry* 151: 707–715.
40. **Prescott CA, Kendler KS** (1999) Genetic and environmental contributions to alcohol abuse and dependence in a population based sample of male twins. *Am J Psychiatry* 156: 34–40.
41. **Suda A, Kawanishi C, Kishida I, Sato R, Yamada T, et al.** (2009) Dopamine D2 receptor gene polymorphisms are associated with suicide attempt in the Japanese population. *Neuropsychobiology* 59(2): 130–4. doi: 10.1159/000213566. Epub 2009 Apr 22.
42. **Johann M, Putzhammer A, Eichhammer P, Wodarz N** (2005) Association of the -141C Del variant of the dopamine D2 receptor (DRD2) with positive family history and suicidality in German alcoholics. *Am J Med Genet B Neuropsychiatr Genet* 132B(1): 46–9.
43. **Schuckit MA** (2009) An overview of genetic influences in alcoholism. *J Subst Abuse Treat* 36: S5–S14.
44. **Schuckit MA, Smith TL, Trim R, Kreikebaum S, Hinga B, et al.** (2008) Testing the level of response to alcohol-based model of heavy drinking and alcohol problems in offspring from the San Diego Prospective Study. *J Stud Alcohol Drugs* 69: 571–579.
45. **Grzywacz A** (2012) Complex determinants of alcohol dependence –analysis of genetic influences. Role of some genetic factors in the onset and course of alcohol dependence. Habilitation thesis. Szczecin: Pomeranian Medical University in Szczecin. ISBN: 978-83-61517-61-0.
46. **Preuss UW, Zill P, Koller G, Bondy B, Soyka M** (2007) D2 dopamine receptor gene haplotypes and their influence on alcohol and tobacco consumption magnitude in alcohol-dependent individuals. *Alcohol* 42(3): 258–66.
47. **Zill P, Preuss UW, Koller G, Bondy B, Soyka M** (2007) SNP- and haplotype analysis of the tryptophan hydroxylase 2 gene in alcohol-dependent patients and alcohol-related suicide. *Neuropsychopharmacology* 32 (8): 1687–94. Epub 2007 Jan 24.
